# Supplementary material for: In situgrowth of nano-gold on anodized aluminum oxide with tandem nanozyme activities towards sensitive electrochemical nanochannel sensing
Source: Royal Society of Chemistry journal article supplement (doi:10.1039/d0an01271h), 2020-01-01
Supplement: d0an01271h1.pdf [file d0an01271h1.pdf]

## Supporting Information

### **In-situ Growth of Nano-Gold on Anodized Aluminum Oxide with Tandem Nanozyme Activities Towards Sensitive Electrochemical Nanochannel Sensing**

Xin Xia, Hui Li, Guoxing Zhou, Lei Ge,\* and Feng Li\*

College of Chemistry and Pharmaceutical Sciences, Qingdao Agricultural University, Qingdao,  
266109, People's Republic of China

\*Corresponding author: Lei Ge, Feng Li

E-mail: lge@qau.edu.cn, lifeng@qust.edu.cn

Telephone: +86-532-86080855

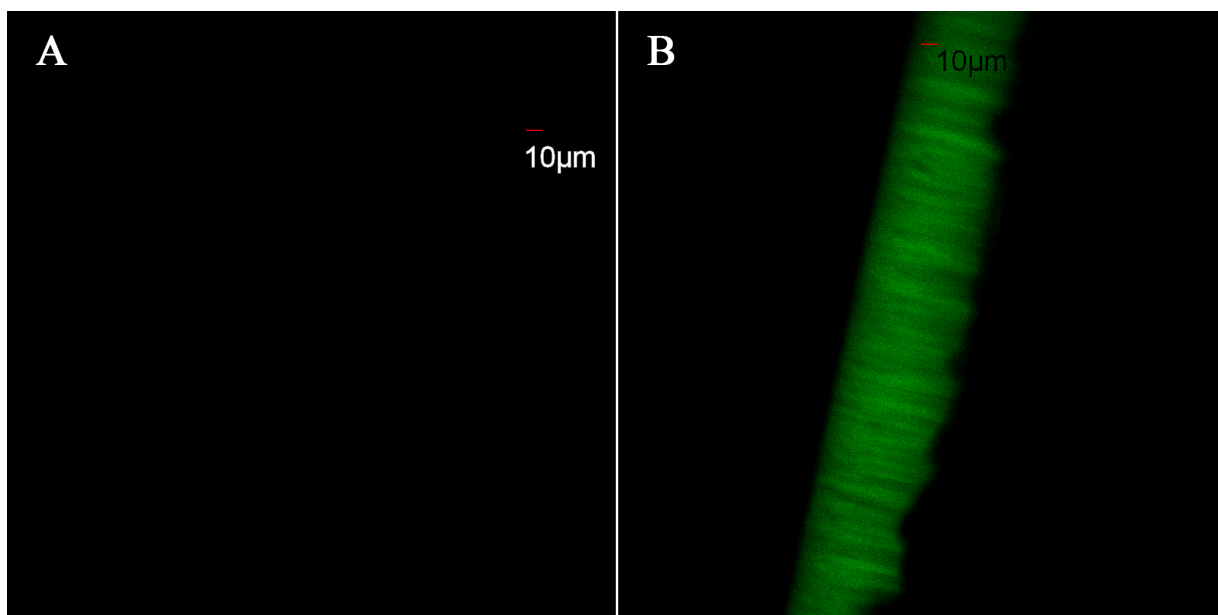

**Figure S1.** The LSCM cross-sectional images of (A) bare AAO nanochannel and (B) PDA-AAO nanochannel.

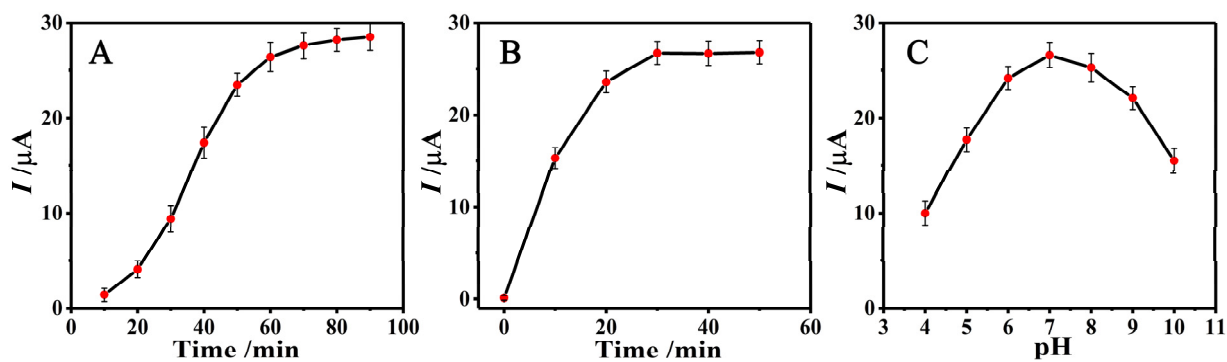

**Figure S2.** Impact of the reaction time for (A) dopamine self-polymerization and (B) AuNPs growth on the ionic current response of Au-PDA-AAO nanochannel towards 10  $\mu\text{M}$  glucose at +1.0 V. (C) Impact of solution pH on the ionic current response of Au-PDA-AAO nanochannel towards 10  $\mu\text{M}$  glucose at +1.0 V.

**Table S1.** Assay performance comparison of our method with other enzyme-free glucose sensors.

| Sensor                        | Linear range              | Detection limit | Reference |
|-------------------------------|---------------------------|-----------------|-----------|
| Nanozyme-based sensor         | 0.4 to 80 mM              | 0.4 mM          | 1         |
| Nanozyme-based sensor         | 1 $\mu$ M to 0.3 mM       | 0.6 $\mu$ M     | 2         |
| Nanozyme-based sensor         | 10 $\mu$ M to 130 $\mu$ M | 0.5 $\mu$ M     | 3         |
| Nanozyme-based sensor         | 10 $\mu$ M to 300 $\mu$ M | 8.5 $\mu$ M     | 4         |
| Nanozyme-based sensor         | 5 $\mu$ M to 1.2 mM       | 1.0 $\mu$ M     | 5         |
| Nanozyme-based sensor         | 10 $\mu$ M to 200 $\mu$ M | 4.2 $\mu$ M     | 6         |
| Electrocatalysis-based sensor | 1 $\mu$ M to 10 mM        | 1.0 $\mu$ M     | 7         |
| Electrocatalysis-based sensor | 30 to 500 $\mu$ M         | 1.0 $\mu$ M     | 8         |
| Electrocatalysis-based sensor | 0.005 to 31 mM.           | 1.0 $\mu$ M     | 9         |
| Electrocatalysis-based sensor | 5.0 $\mu$ M to 2.0 mM     | 2.0 $\mu$ M     | 10        |
| Electrocatalysis-based sensor | 2 $\mu$ M to 2.5 mM       | 1.0 $\mu$ M     | 11        |
| Electrocatalysis-based sensor | 0.005 to 3.0 mM           | 1.2 $\mu$ M     | 12        |
| Au-PDA-AAO nanochannel sensor | 0.5 $\mu$ M to 50 $\mu$ M | 0.2 $\mu$ M     | This work |

## References

- (1) Zeng, D.; Luo, W.; Li, J.; Liu, H.; Ma, H.; Huang, Q.; Fan, C. Gold Nanoparticles-Based Nanoconjugates for Enhanced Enzyme Cascade and Glucose Sensing. *Analyt* **2012**, *137*, 4435-4439.
- (2) Zhang, H.; Liang, X.; Han, L.; Li, F. "Non-Naked" Gold with Glucose Oxidase-Like Activity: A Nanozyme for Tandem Catalysis. *Small* **2018**, *14*, 1803256.
- (3) He, X.; Tan, L.; Chen, D.; Wu, X.; Ren, X.; Zhang, Y.; Meng, X.; Tang, F. Fe<sub>3</sub>O<sub>4</sub>-Au@Mesoporous SiO<sub>2</sub> Microspheres: An Ideal Artificial Enzymatic Cascade System. *Chemical Communications* **2013**, *49*, 4643-4645.
- (4) Huang, Y.; Zhao, M.; Han, S.; Lai, Z.; Yang, J.; Tan, C.; Ma, Q.; Lu, Q.; Chen, J.; Zhang, X.; Zhang, Z.; Li, B.; Chen, B.; Zong, Y.; Zhang, H. Growth of Au Nanoparticles on 2d Metalloporphyrinic Metal-Organic Framework Nanosheets Used as Biomimetic Catalysts for Cascade Reactions. *Advanced Materials* **2017**, *29*, 1700102.

- (5) Han, L.; Zhang, H.; Chen, D.; Li, F. Protein-Directed Metal Oxide Nanoflakes with Tandem Enzyme-Like Characteristics: Colorimetric Glucose Sensing Based on One-Pot Enzyme-Free Cascade Catalysis. *Advanced Functional Materials* **2018**, *28*, 1800018.
- (6) Hu, Y.; Cheng, H.; Zhao, X.; Wu, J.; Muhammad, F.; Lin, S.; He, J.; Zhou, L.; Zhang, C.; Deng, Y.; Wang, P.; Zhou, Z.; Nie, S.; Wei, H. Surface-Enhanced Raman Scattering Active Gold Nanoparticles with Enzyme-Mimicking Activities for Measuring Glucose and Lactate in Living Tissues. *ACS Nano* **2017**, *11*, 5558-5566.
- (7) Guo, L.; Li, Z.; Marcus, K.; Navarro, S.; Liang, K.; Zhou, L.; Mani, P. D.; Florczyk, S. J.; Coffey, K. R.; Orlovskaya, N.; Sohn, Y.-H.; Yang, Y. Periodically Patterned Au-TiO<sub>2</sub> Heterostructures for Photoelectrochemical Sensor. *ACS Sens.* **2017**, *2*, 621-625.
- (8) Lin, T.-W.; Liu, C.-J.; Dai, C.-S. Ni<sub>3</sub>S<sub>2</sub>/Carbon Nanotube Nanocomposite as Electrode Material for Hydrogen Evolution Reaction in Alkaline Electrolyte and Enzyme-Free Glucose Detection. *Appl. Catal. B* **2014**, *154-155*, 213-220.
- (9) Wang, L.; Zhu, W.; Lu, W.; Qin, X.; Xu, X. Surface Plasmon Aided High Sensitive Non-Enzymatic Glucose Sensor Using Au/Ni<sub>3</sub>S<sub>2</sub> Multilayered Nanowire Arrays. *Biosensors and Bioelectronics* **2018**, *111*, 41-46.
- (10) Choi, T.; Kim, S. H.; Lee, C. W.; Kim, H.; Choi, S.-K.; Kim, S.-H.; Kim, E.; Park, J.; Kim, H. Synthesis of Carbon Nanotube–Nickel Nanocomposites Using Atomic Layer Deposition for High-Performance Non-Enzymatic Glucose Sensing. *Biosensors and Bioelectronics* **2015**, *63*, 325-330.
- (11) Liu, Y.; Teng, H.; Hou, H.; You, T. Nonenzymatic Glucose Sensor Based on Renewable Electrospun Ni Nanoparticle-Loaded Carbon Nanofiber Paste Electrode. *Biosens. Bioelectron.* **2009**, *24*, 3329-3334.
- (12) Huo, H.; Zhao, Y.; Xu, C. 3d Ni<sub>3</sub>S<sub>2</sub> Nanosheet Arrays Supported on Ni Foam for High-Performance Supercapacitor and Non-Enzymatic Glucose Detection. *Journal of Materials Chemistry A* **2014**, *2*, 15111-15117.
